# Supplementary material for: A composite solid polymer electrolyte incorporating MnO2 nanosheets with reinforced mechanical properties and electrochemical stability for lithium metal batteries
Source: Royal Society of Chemistry journal article supplement (doi:10.1039/c9ta11542k), 2019-12-24
Supplement: c9ta11542k1.pdf [file c9ta11542k1.pdf]

## Supporting Information

### **Composite solid polymer electrolyte incorporating MnO<sub>2</sub> nanosheets with reinforced mechanical properties and electrochemical stability for lithium metal battery**

*Yuhan Li,<sup>a</sup> Zongjie Sun,<sup>a</sup> Dongyu Liu,<sup>b</sup> Yiyang Gao,<sup>a</sup> Yuankun Wang,<sup>a</sup> Huaitian Bu,<sup>c</sup> Mingtao Li,<sup>b</sup> Yanfeng Zhang,<sup>a</sup> Guoxin Gao,<sup>a\*</sup> and Shujiang Ding<sup>a\*</sup>*

<sup>a</sup>Department of Applied Chemistry, School of Science, Xi'an Key Laboratory of Sustainable Energy Materials Chemistry, MOE Key Laboratory for Nonequilibrium Synthesis and Modulation of Condensed Matter, State Key Laboratory of Electrical Insulation and Power Equipment, Xi'an Jiaotong University, Xi'an 710049, People's Republic of China.

\*Email: [gaoguoxin@mail.xjtu.edu.cn](mailto:gaoguoxin@mail.xjtu.edu.cn); [dingsj@mail.xjtu.edu.cn](mailto:dingsj@mail.xjtu.edu.cn)

<sup>b</sup>International Research Center for Renewable Energy, State Key Laboratory of Multiphase Flow in Power Engineering, Xi'an Jiaotong University, Shaanxi 710049, China.

<sup>c</sup>Department of Materials and Nanotechnology, SINTEF Industry, Forskningsveien 1, 0373 Oslo, Norway.

Keywords: MnO<sub>2</sub> nanosheets; Polyethylene oxide; Composite polymer electrolyte; Solid Li metal battery; DFT calculations.

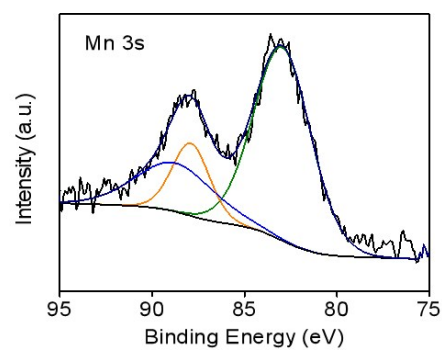

**Figure S1.** XPS spectra of MnO<sub>2</sub> nanosheets: MnO<sub>2</sub> 3s spectrum.

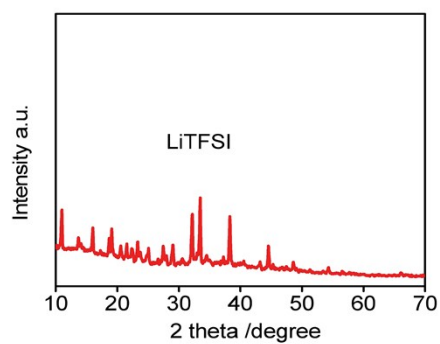

**Figure S2.** XRD of LiTFSI. The peaks at  $11.04^\circ$ ,  $16.03^\circ$ ,  $19.09^\circ$ ,  $20.55^\circ$ ,  $21.54^\circ$ ,  $23.32^\circ$ ,  $25.07^\circ$ ,  $27.4^\circ$ ,  $29.03^\circ$ ,  $32.20^\circ$ ,  $33.48^\circ$ ,  $38.30^\circ$  and  $44.54^\circ$  perfectly match to (002), (011), (201), (111), (202), (013), (113), (212), (114), (015), (115), (116) and (125) crystal planes.

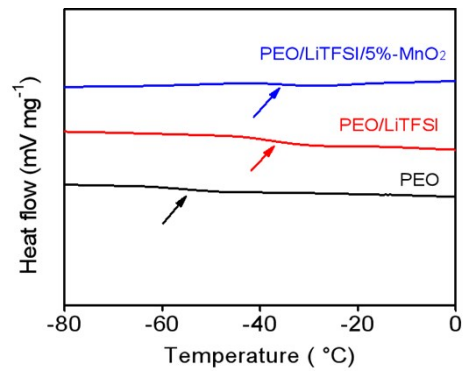

**Figure S3.** DSC spectrum of LiTFSI for detailed region.

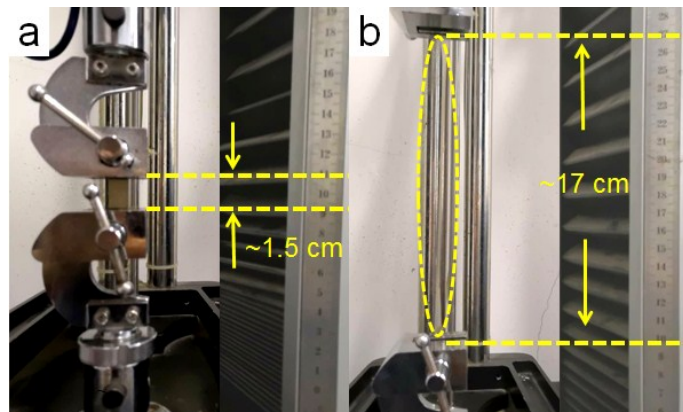

**Figure S4.** The digital photos of CPE containing 5 wt %  $\text{MnO}_2$  nanosheets at the initial and final tension states.

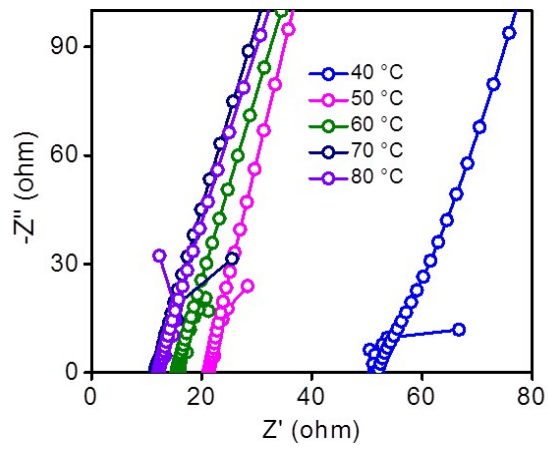

**Figure S5.** EIS plots of PEO/LiTFSI/MnO<sub>2</sub> CSPE composite electrolyte at different temperatures.

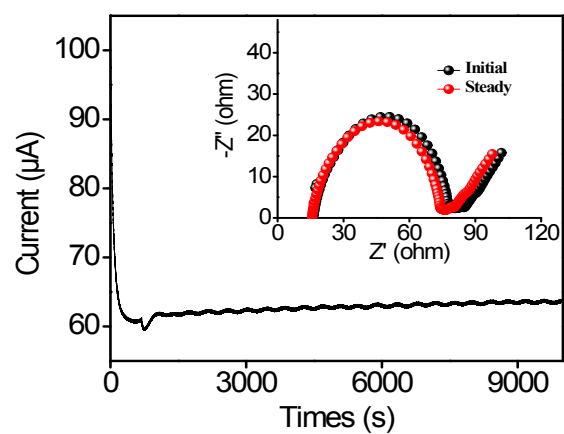

**Figure S6.** (a) i-t curve for PEO/LiTFSI SPE at 60 °C with polarization voltage of 10 mV. (b) The A. C impedance plots before and after the polarization.

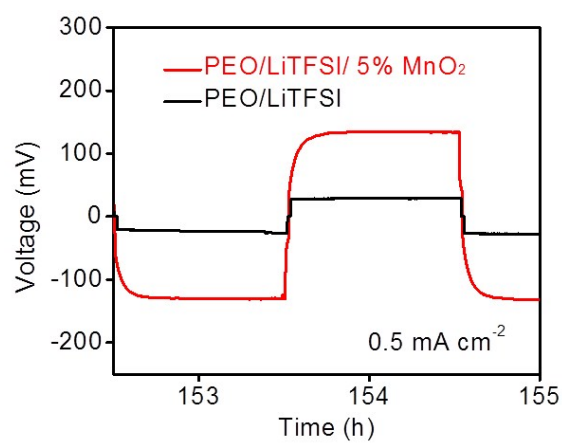

**Figure S7.** The magnified region of voltage profiles for selected cycles at 0.5 mA cm<sup>-2</sup>.



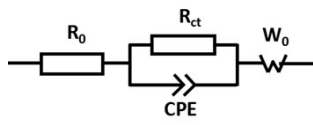

**Figure S8.** The equivalent circuit of Li/PEO/LiTFSI SPE/LiFePO<sub>4</sub> and Li/PEO/LiTFSI/MnO<sub>2</sub> CSPE/LiFePO<sub>4</sub> cell at 60 °C.

**Table S1.** Mechanical data of PEO/LiTFSI SPE with different contents of MnO<sub>2</sub> nanosheets at room temperature.

|                              | PEO/LiTFSI | PEO/LiTFSI/<br>1% MnO <sub>2</sub> | PEO/LiTFSI/<br>3% MnO <sub>2</sub> | PEO/LiTFSI/<br>5% MnO <sub>2</sub> | PEO/LiTFSI/<br>7% MnO <sub>2</sub> |
|------------------------------|------------|------------------------------------|------------------------------------|------------------------------------|------------------------------------|
| tensile strength             | 0.56 MPa   | 0.88 MPa                           | 1.14 MPa                           | 1.27 MPa                           | 0.77 MPa                           |
| elongation-at-break<br>value | 858 %      | 1804 %                             | 861 %                              | 1045 %                             | 911 %                              |

**Table S2.** The ionic conductivity of PEO/LiTFSI SPE with different contents of MnO<sub>2</sub> nanosheets at different temperature.

| $\sigma \times 10^{-4} \text{ S cm}^{-1}$ | PEO/LiTFSI | PEO/LiTFSI/1%    | PEO/LiTFSI/3%    | PEO/LiTFSI/5%    | PEO/LiTFSI/7%    |
|-------------------------------------------|------------|------------------|------------------|------------------|------------------|
|                                           |            | MnO <sub>2</sub> | MnO <sub>2</sub> | MnO <sub>2</sub> | MnO <sub>2</sub> |
| 25 °C                                     | 0.055      | 0.084            | 0.083            | 0.08             | 0.177            |
| 30 °C                                     | 0.138      | 0.227            | 0.240            | 0.195            | 0.320            |
| 40 °C                                     | 0.430      | 0.72             | 0.588            | 0.623            | 0.920            |
| 50 °C                                     | 1.04       | 1.75             | 1.28             | 1.52             | 1.60             |
| 60 °C                                     | 1.37       | 2.06             | 1.47             | 2.10             | 1.82             |
| 70 °C                                     | 1.51       | 2.89             | 1.72             | 2.78             | 2.63             |
| 80 °C                                     | 1.49       | 2.71             | 1.78             | 2.66             | 2.90             |

**Table S3.** The ionic conductivity of PEO/LiTFSI SPE with different contents of MnO<sub>2</sub> nanosheets at different temperature.

|                                                                  | PEO  | LiTFSI | PEO/LiTFSI | PEO/LiTFSI/MnO <sub>2</sub> |
|------------------------------------------------------------------|------|--------|------------|-----------------------------|
| -CH <sub>2</sub> - wagging absorptions in trans planar structure | 1346 |        | 1354       | 1352                        |
| -CH <sub>2</sub> - twist in helical structure                    | 1279 |        | 1281       | 1281                        |
| -CH <sub>2</sub> - twist in trans planar structure               | 1236 |        | 1240       | 1234                        |
| Asymmetric -SO <sub>2</sub> - stretching                         |      | 1325   | 1327       | 1336                        |
| Symmetric stretching of -CF <sub>3</sub>                         |      | 1244   | 1228       | ---                         |
| Asymmetric stretching of -CF <sub>3</sub>                        |      | 1198   | 1190       | 1190                        |

**Table S4.** The corresponding simulated impedance parameters in an equivalent circuit.

| Battery sample                 | Before cycle       |                       | After 5 cycles     |                       |
|--------------------------------|--------------------|-----------------------|--------------------|-----------------------|
|                                | $R_0$ ( $\Omega$ ) | $R_{ct}$ ( $\Omega$ ) | $R_0$ ( $\Omega$ ) | $R_{ct}$ ( $\Omega$ ) |
| PEO/LiTFSI/5% MnO <sub>2</sub> | 20.33              | 167.5                 | 29.64              | 132.9                 |
| PEO/LiTFSI                     | 23.49              | 2441                  | 21.11              | 1372                  |

**Table S5.** Comparison of electrochemical cycle performance ofLi/PEO/LiTFSI/MnO<sub>2</sub> CSPE/LiFePO<sub>4</sub> with other reported PEO-based electrolyte.

| Electrolyte                                                                                        | Cycle number | Discharge capacity (cathode material: LiFePO <sub>4</sub> ) | Temperature | Reference                                           |
|----------------------------------------------------------------------------------------------------|--------------|-------------------------------------------------------------|-------------|-----------------------------------------------------|
| PEO/LiTFSI/MnO <sub>2</sub> CSPE                                                                   | 300          | 143.5 mAh g <sup>-1</sup> / 0.5 C                           | 60 °C       | This work                                           |
| Li <sub>7</sub> La <sub>3</sub> Zr <sub>2</sub> O <sub>12</sub> Nanowire/PEO composite electrolyte | 70           | 158.8 mAh g <sup>-1</sup> / 0.5 C                           | 60 °C       | Adv. Funct. Mater. <b>2019</b> , 29, 1805301        |
| PEO/LLZO composite electrolyte                                                                     | 200          | 127 mAh g <sup>-1</sup> / 0.2 C                             | 55 °C       | Nano Energy <b>2018</b> , 46, 176                   |
| Pyrrolidone-PEO solid electrolyte                                                                  | --           | --                                                          | --          | <i>Electrochimica Acta</i> <b>2019</b> , 293, 25.   |
| PEG-based polymer electrolyte                                                                      | 20           | 140 mAh g <sup>-1</sup> / 0.2 C                             | 30 °C       | <i>Adv. Mater. Interfaces</i> <b>2018</b> , 1801445 |
| PEG-to-PVP triblock gel polymer electrolytes                                                       | 30           | 135 mAh g <sup>-1</sup> / 0.1 C                             | 60 °C       | <i>Polym. Chem.</i> <b>2018</b> , 9, 5190           |
| Carbon quantum dots-PEO solid electrolyte                                                          | 100          | 100 mAh g <sup>-1</sup> / 1 C                               | 60 °C       | Adv. Sci. <b>2018</b> , 1700996                     |
| Ionic liquid-PEO solid electrolyte                                                                 | 50           | 140 mAh g <sup>-1</sup> / 0.1 C                             | 60 °C       | <i>J. Hydrogen Energy</i> <b>2017</b> , 42, 7212.   |
| PIL-IL-SiO <sub>2</sub> nanoplates PEO polymer electrolyte                                         | 30           | 145.5 mAh g <sup>-1</sup> / 0.1 C                           | 60 °C       | <i>Nano Energy</i> , <b>2017</b> , 33, 110.         |
